# Supplementary material for: Trends in the risk of cardiovascular disease in women with breast cancer in a Dutch nationwide cohort study
Source: PubMed Central journal article supplement — BMJ Open. 2019 May 30;9(5):e022664. doi: 10.1136/bmjopen-2018-022664 (PMC6549609; doi:10.1136/bmjopen-2018-022664), 2019-05-30
Supplement: bmjopen-2018-022664supp001.pdf [file bmjopen-2018-022664supp001.pdf]

**Supplementary table A.** Validation of breast cancer discharge codes of the Dutch Hospital Discharge Register among 90 patients

|                                                      | %     |
|------------------------------------------------------|-------|
| <b>Known with breast cancer?</b>                     |       |
| Yes                                                  | 100.0 |
| No                                                   | 0.0   |
| <b>Discharge diagnosis correct?</b>                  |       |
| Yes                                                  | 93.7  |
| No                                                   | 6.6   |
| <b>Reasons for incorrect discharge codes (n = 6)</b> |       |
| Date of discharge differed one day                   | 1.1   |
| Date of discharge differed two weeks                 | 2.2   |
| Date of discharge differed two months                | 2.2   |
| Date of discharge differed five months               | 1.1   |
